# Supplementary material for: Versatile transition metal monolayers with catalytic and superconducting properties: a computational study
Source: Royal Society of Chemistry journal article supplement (doi:10.1039/d3cp01205k), 2023-01-01
Supplement: d3cp01205k1.pdf [file d3cp01205k1.pdf]

## Supporting Information

### Versatile transition metals monolayers with Catalytic and Superconducting Properties: Computational study

Xue Li<sup>a</sup>, Hanyu Liu<sup>b\*</sup>, and Siyu Lu<sup>a\*</sup>

- a. Henan Institute of Advanced Technology, Green Catalysis Center, and College of Chemistry, Zhengzhou University, Zhengzhou 450001, China
- b. International Center for Computational Method & Software, State Key Laboratory of Superhard Materials, Laboratory of Physics and Technology for Advanced Batteries (Ministry of Education), College of Physics, Jilin University, Changchun 130012, China

## Contents

1. **Figure S1.** Phonon dispersion curves of VRu<sub>2</sub>, FeRu<sub>2</sub>, ReRu<sub>2</sub>, MoRu<sub>2</sub>, WRu<sub>2</sub>, MnRu<sub>2</sub>, TiRu<sub>2</sub>, VOsRu, and VFeRu.
2. **Figure S2.** Phonon dispersion curves of ScRu<sub>2</sub>, CrRu<sub>2</sub>, CoRu<sub>2</sub>, NiRu<sub>2</sub>, CuRu<sub>2</sub>, ZnRu<sub>2</sub>, YRu<sub>2</sub>, ZrRu<sub>2</sub>, NbRu<sub>2</sub>, RhRu<sub>2</sub>, PdRu<sub>2</sub>, AgRu<sub>2</sub>, CdRu<sub>2</sub>, HfRu<sub>2</sub>, TaRu<sub>2</sub>, IrRu<sub>2</sub>, PtRu<sub>2</sub> and AuRu<sub>2</sub>.
3. **Figure S3.** Optimized configurations for hydrogen atoms and Binding energies of VFeRu, FeRu<sub>2</sub>, ReRu<sub>2</sub>, VRu<sub>2</sub>, VOsRu, MoRu<sub>2</sub>, WRu<sub>2</sub>, MnRu<sub>2</sub> and TiRu<sub>2</sub>.
4. **Figure S4.** Calculated *d*-band center among newly predicted compounds.
5. **Figure S5.** Calculated orbital-resolved band structures for FeRu<sub>2</sub> and VRu<sub>2</sub>.
6. **Figure S6.** Electron localization function for FeRu<sub>2</sub> and VRu<sub>2</sub>.
7. **Figure S7.** Calculated phonon band structure of FeRu<sub>2</sub> with the strength of *q*-resolved  $\lambda_q$  indicated by circle size.
8. **Figure S8.** The variation of T<sub>c</sub>,  $\lambda$  and pressure for (a) FeRu<sub>2</sub> and (b) VFeRu.
9. **Table S1.** Superconducting temperature under different uniaxial and biaxial stresses.
10. **Table S2.** Calculated free energy of atomic hydrogen ( $\Delta G_H$ ) and Binding energies ( $\Delta E_H$ ) for different H atoms (*n*) adsorbed on an VRu<sub>2</sub> monolayer respectively.
11. **Table S3.** Calculated Bulk Modulus (B), Young's Modulus (E), and Shear Modulus (G) for stable XRu<sub>2</sub> and VXRu.
12. **Table S4.** Total energies (eV/atom) under different magnetic configurations.

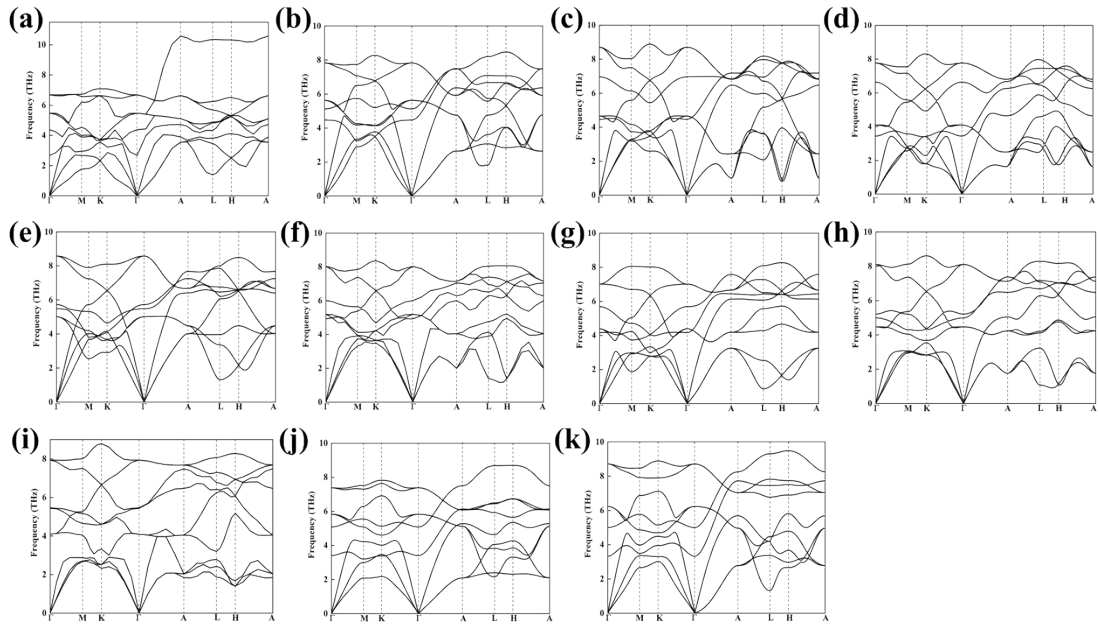

**Figure S1.** Phonon dispersion curves of (a)  $\text{TiRu}_2$ , (b)  $\text{VRu}_2$ , (c)  $\text{MnRu}_2$ , (d)  $\text{FeRu}_2$ , (e)  $\text{MoRu}_2$ , (f)  $\text{TcRu}_2$ , (g)  $\text{WRu}_2$ , (h)  $\text{ReRu}_2$ , (i)  $\text{OsRu}_2$ , (j)  $\text{VOsRu}$ , and (k)  $\text{VFeRu}$ .

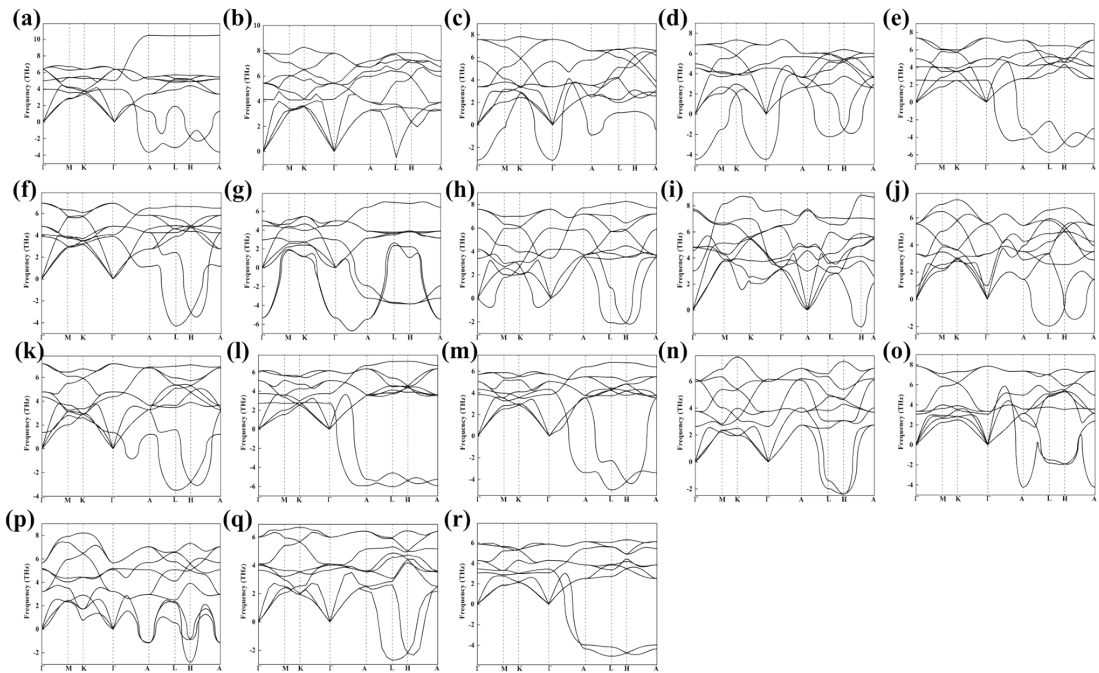

**Figure S2.** Phonon dispersion curves of (a)  $\text{ScRu}_2$ , (b)  $\text{CrRu}_2$ , (c)  $\text{CoRu}_2$ , (d)  $\text{NiRu}_2$ , (e)  $\text{CuRu}_2$ , (f)  $\text{ZnRu}_2$ , (g)  $\text{YRu}_2$ , (h)  $\text{ZrRu}_2$ , (i)  $\text{NbRu}_2$ , (j)  $\text{RhRu}_2$ , (k)  $\text{PdRu}_2$ , (l)  $\text{AgRu}_2$ , (m)  $\text{CdRu}_2$ , (n)  $\text{HfRu}_2$ , (o)  $\text{TaRu}_2$ , (p)  $\text{IrRu}_2$ , (q)  $\text{PtRu}_2$  and (r)  $\text{AuRu}_2$ . It is clearly seen that phonon mode shows obvious softening in these systems, leading to structural instability.

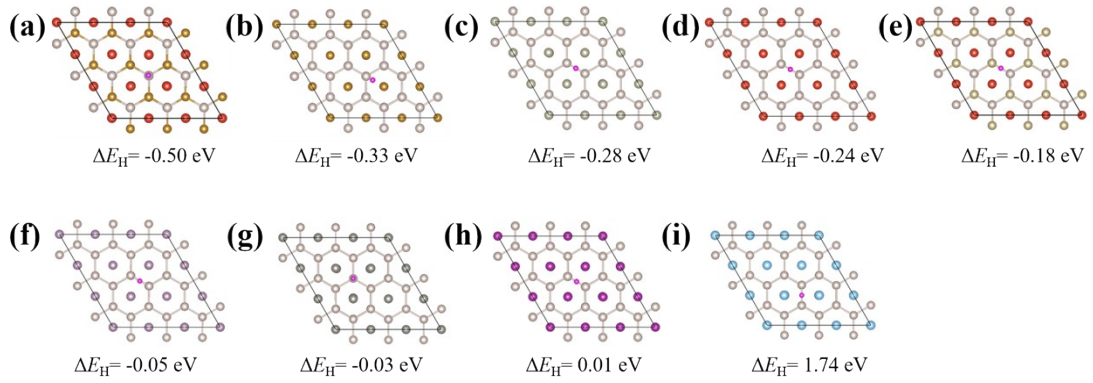

**Figure S3.** Optimized configurations for hydrogen atoms and Binding energies of VFeRu (a), FeRu<sub>2</sub> (b), ReRu<sub>2</sub> (c), VRu<sub>2</sub> (d), VOsRu (e), MoRu<sub>2</sub> (f), WRu<sub>2</sub> (g), MnRu<sub>2</sub> (h) and TiRu<sub>2</sub> (i).

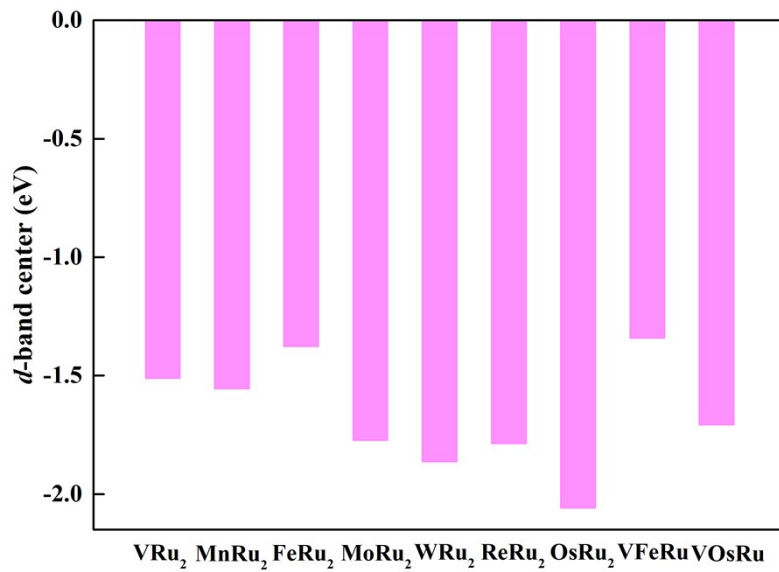

**Figure S4.** Calculated *d*-band center among newly predicted compounds.

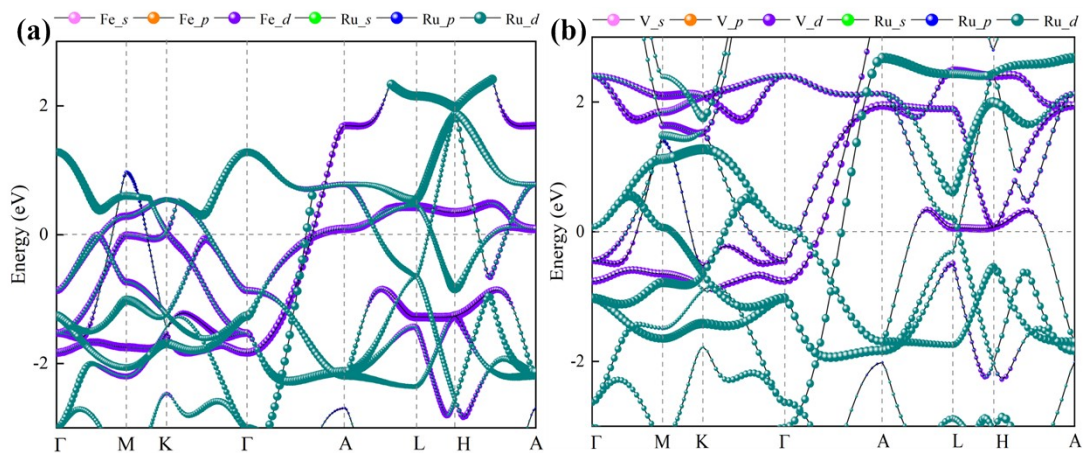

**Figure S5.** Calculated orbital-resolved band structures for (a) FeRu<sub>2</sub> and (b) VRu<sub>2</sub>.



|                   |      |      |      |      |      |      |      |      |
|-------------------|------|------|------|------|------|------|------|------|
| MnRu <sub>2</sub> | 12.5 | 13.1 | 12.6 | 14.1 | 12.2 | 13.3 | 14.1 | 13.3 |
| TiRu <sub>2</sub> | 12.0 | 12.0 | 11.4 | 11.7 | 11.9 | 11.3 | 12.0 | 11.9 |
| MoRu <sub>2</sub> | 12.1 | 12.1 | 12.1 | 12.1 | 12.0 | 12.1 | 12.1 | 12.0 |
| OsRu <sub>2</sub> | 9.7  | 9.7  | 9.6  | 9.7  | 9.7  | 9.7  | 9.7  | 9.7  |
| WRu <sub>2</sub>  | 8.7  | 8.8  | 8.8  | 8.8  | 8.8  | 8.7  | 8.7  | 8.7  |
| TcRu <sub>2</sub> | 7.7  | 7.7  | 7.7  | 7.7  | 7.7  | 7.7  | 7.7  | 7.6  |
| ReRu <sub>2</sub> | 6.2  | 6.2  | 6.2  | 6.2  | 6.2  | 6.2  | 6.2  | 6.2  |
| VFeRu             | 12.6 | 12.7 | 14.8 | 16.0 | 14.2 | 16.1 | 15.9 | 13.7 |
| VOsRu             | 9.0  | 9.0  | 9.0  | 8.8  | 8.9  | 9.0  | 8.9  | 8.9  |

**Table S2.** Calculated free energy of atomic hydrogen ( $\Delta G_H$ ) and Binding energies ( $\Delta E_H$ ) for different H atoms (n) adsorbed on an VRu<sub>2</sub> monolayer respectively.

|                   |        |        |        |        |        |        |        |        |        |
|-------------------|--------|--------|--------|--------|--------|--------|--------|--------|--------|
| n                 | 1      | 2      | 3      | 4      | 5      | 6      | 7      | 8      | 9      |
| $\Delta G_H$ (eV) | -0.002 | 0.027  | 0.056  | 0.049  | 0.074  | 0.096  | 0.061  | 0.093  | 0.119  |
| $\Delta E_H$ (eV) | -0.242 | -0.213 | -0.184 | -0.191 | -0.166 | -0.144 | -0.179 | -0.147 | -0.121 |

**Table S3.** Calculated Bulk Modulus (B), Young's Modulus (E), and Shear Modulus (G) for stable XRu<sub>2</sub> (X= Ti, V, Mn, Fe, Mo, Tc, W, Re, Os) and VXRu (X=Os, Fe).

| XRu <sub>2</sub>  | B (GPa) | E (GPa) | G (GPa) |
|-------------------|---------|---------|---------|
| FeRu <sub>2</sub> | 270     | 238     | 88      |
| VRu <sub>2</sub>  | 254     | 198     | 726     |
| MnRu <sub>2</sub> | 280     | 286     | 107     |
| TiRu <sub>2</sub> | 218     | 131     | 468     |
| MoRu <sub>2</sub> | 281     | 285     | 107     |
| OsRu <sub>2</sub> | 325     | 395     | 152     |
| WRu <sub>2</sub>  | 297     | 282     | 105     |
| TcRu <sub>2</sub> | 299     | 361     | 139     |
| ReRu <sub>2</sub> | 323     | 383     | 147     |
| VFeRu             | 279     | 228     | 838     |
| VOsRu             | 245     | 171     | 61      |

**Table S4.** Total energies (eV/atom) under different magnetic configurations.

| Configurations    | NM     | FM     | AFM    |
|-------------------|--------|--------|--------|
| FeRu <sub>2</sub> | -8.584 | -8.573 | -8.572 |
| VRu <sub>2</sub>  | -9.134 | -9.134 | -9.135 |
| MnRu <sub>2</sub> | -8.918 | -8.918 | -8.894 |
| TiRu <sub>2</sub> | -8.910 | -8.910 | -8.911 |

|                   |         |         |         |
|-------------------|---------|---------|---------|
| MoRu <sub>2</sub> | -9.671  | -9.671  | -9.671  |
| OsRu <sub>2</sub> | -9.656  | -9.656  | -9.655  |
| WRu <sub>2</sub>  | -10.317 | -10.317 | -10.317 |
| TcRu <sub>2</sub> | -9.479  | -9.479  | -9.479  |
| ReRu <sub>2</sub> | -10.148 | -10.148 | -10.148 |
| VFeRu             | -8.725  | -8.725  | -8.725  |
| VOsRu             | -9.743  | -9.743  | -9.743  |
